# Supplementary material
Source: PubMed Central journal article supplement (PMC4464948)
Supplement: NIHMS686708-supplement-4.pdf [file NIHMS686708-supplement-4.pdf]

# Supplemental Information

## Supplemental Data

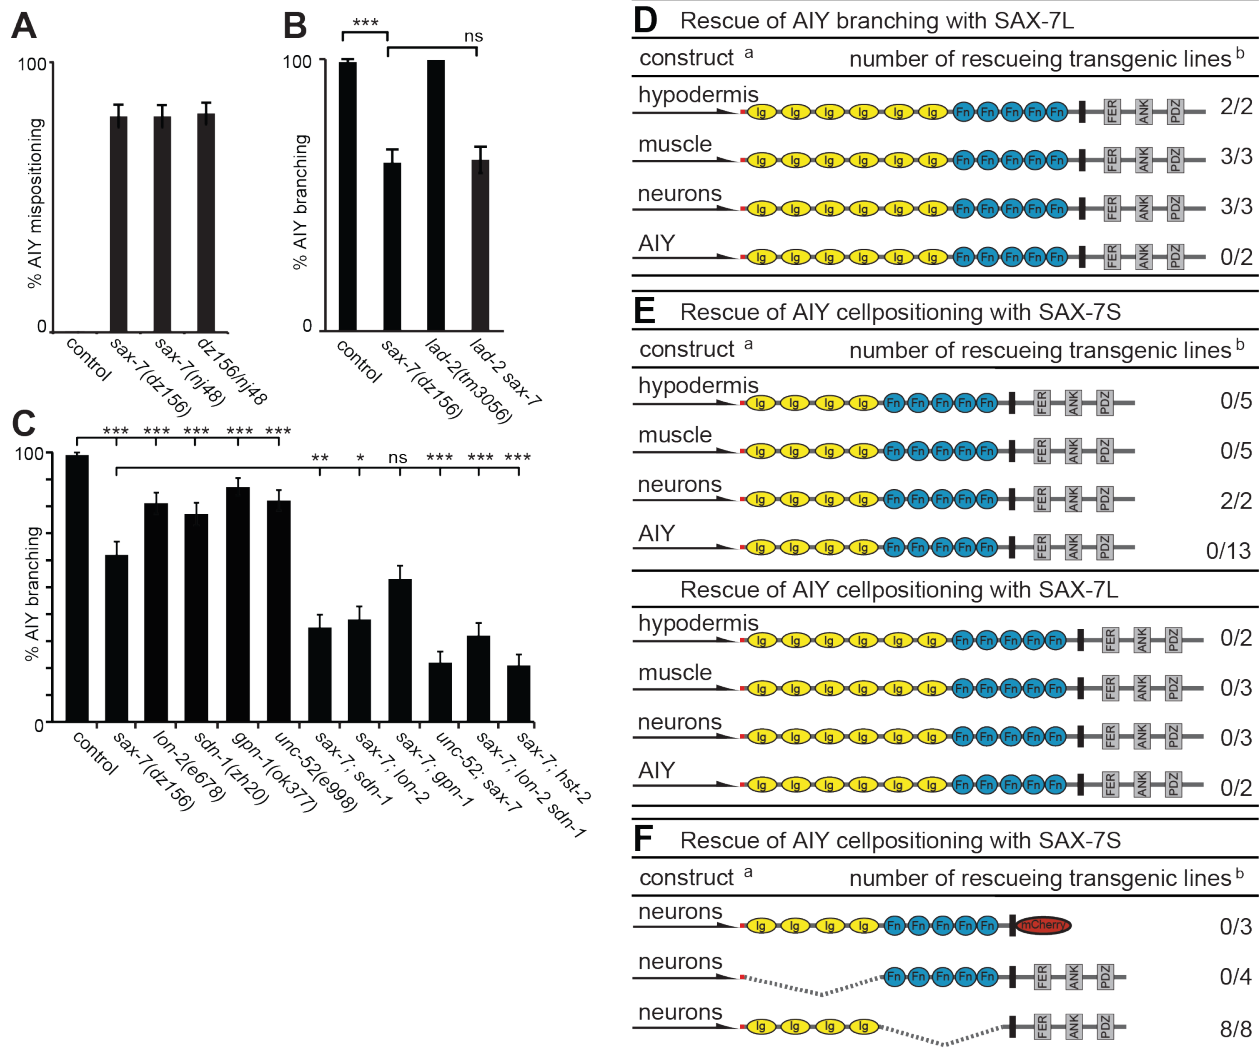

**Figure S1. Genetic analyses of AIY branching and cell positioning defects, Related to Figure 1.**

**A** Quantification of cell positioning defects of AIY interneurons in the genetic backgrounds indicated. N = 100 in all assays. See Dataset S1 for full primary data.

**B – C** Quantification of *kal-1/anosmin-1*-dependent branching in AIY interneurons in the genotypes indicated. Data for *sdn-1(zh20)*, *gpn-1(ok377)*, *lon-2(e678)* and *unc-52(e998)* are from (Díaz-Balzac et al., 2014) and shown for comparison only. N=100 in all cases.

Statistical significance in panels B and C is indicated as: ns: not significant, \*\*\*:  $P < 0.0005$ . See Dataset S1 for full primary data.

- D** Transgenic rescue of suppression of *kal-1/anosmin-1*-dependent branching in AIY interneurons. Shown are SAX-7L constructs as indicated under control of different heterologous promoters (*Pdpy-7*: hypodermal (Gilleard et al., 1997), *Pmyo-3*: muscle (Okkema et al., 1993), *Punc-14*: pan-neuronal (Ogura et al., 1997), *Pttx-3*: AIY specific (Altun-Gultekin et al., 2001)) and the number of rescuing lines out of the total number of lines. Note that the *unc-14* promoter may display some additional hypodermal expression (Díaz-Balzac & Bülow, unpublished). <sup>a</sup> Color coding and abbreviations in B-D as in Fig. 3. <sup>b</sup> Rescue in all panels was defined as transgenic animals being statistically significant ( $P < 0.05$ ) when compared to nontransgenic siblings. See Dataset S2 for full primary data.
- E** Transgenic rescue of AIY interneuron positioning defects. Shown are different SAX-7/L1CAM constructs under control of different heterologous promoters (*Pdpy-7*: hypodermal (Gilleard et al., 1997), *Pmyo-3*: muscle (Okkema et al., 1993), *Punc-14*: pan-neuronal (Ogura et al., 1997), *Pttx-3*: AIY specific (Altun-Gultekin et al., 2001)) with the number of rescuing lines out of the total number of lines indicated. See Dataset S2 for full primary data.
- F** Transgenic rescue of AIY interneuron cell positioning defects. Shown are different SAX-7S deletion constructs under control the pan-neuronal *Punc-14* promoter (Ogura et al., 1997). Note, that some hypodermal expression for the *Punc-14* promoter has been reported. Extent of deletions is indicated by dashed lines. See Dataset S2 for full primary data.

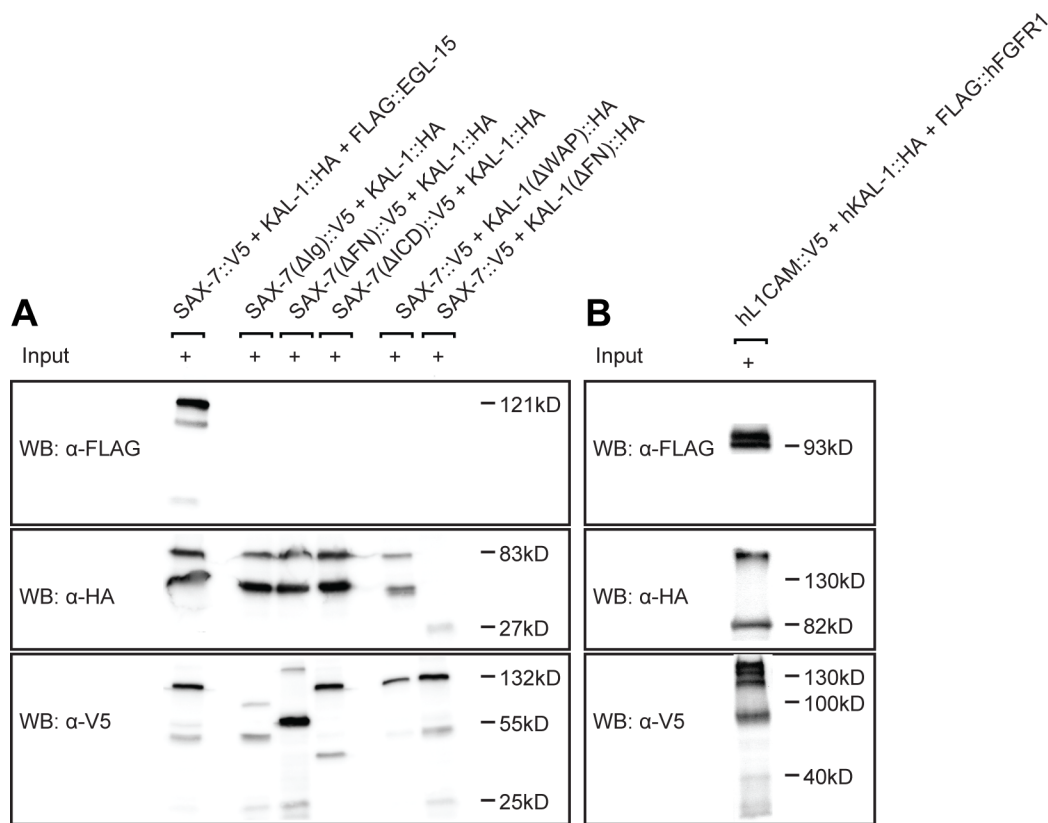

**Figure S2. Western Blots of lysates after transient transfection, Related to Figure 4.**

- A** Western Blots (WB) with the antibodies indicated on the left of lysates transiently expressing the different SAX-7S::V5, HA::KAL-1 and FLAG::EGL-15A constructs as well as deletion derivatives as indicated in Figure 4. Lanes (1), (2-4) and (5-6) are the input control blots for Figure 4B,E and F, respectively. Note that EGL-15A and SAX-7S run always as a triplet as previously described (Pocock et al., 2008) whereas KAL-1/anosmin-1 runs as a doublet possibly due to proteolytic cleavage.
- B** Western Blots (WB) with the antibodies indicated on the left of lysates transiently expressing the different hL1CAM::V5, KAL-1::HA and FLAG::hFGFR1 constructs as indicated in Figure 4D. Note that hFGFR1 runs always as a doublet whereas L1CAM runs as a triplet, similar to the *C. elegans* ortholog SAX-7. For human hKAL1 we observe a higher molecular band, possibly due to dimerization.

**Dataset S1. Excel spreadsheet containing complete quantification data and statistical analysis for genetic experiments, Related to Figures 1 and 2.**

Worksheets are color coded as follows. Red: data for *kal-1/anosmin-1*-dependent branching in AIY neurons. Green: data for AIY cell positioning defects. Blue: data for HSN branching defects.

**Dataset S2. Excel spreadsheet containing complete quantification data and statistical analysis for transgenic rescue experiments of AIY branching, AIY cell positioning and HSN branching phenotypes, Related to Figure 3.**

Worksheets are color coded as follows. Red: data for *kal-1/anosmin-1*-dependent branching in AIY neurons (AIY bra.). Green: data for AIY cell positioning defects (AIY cp.). Blue: data for HSN branching defects (HSN).

## **Supplemental Experimental Procedures**

### **Strain list**

#### ***Fluorescent reporter strains***

AIY: *mgls18* [*Pttx-3::GFP*]IV (Altun-Gultekin et al., 2001).

HSN: *zdis13* [*Ptph-1::GFP*]IV (Clark and Chiu, 2003).

#### ***Strains related to kal-1/anosmin-1-dependent branching in AIY neurons.***

OH124: *mgls18IV; otls35X*

EB615: *mgls32II; otls35X*

OH912: *otls76mgls18IV*

EB945: *sax-7(dz156) otls76 mgls18IV*

EB1023: *sax-7(nj48) otls76 mgls18IV*

EB981: *mgls32III; sax-7(nj48)IV; otls35X*

EB983: *mgls32III; sax-7(nj13)IV; otls35X*

EB985: *mgls32III; sax-7(nj52)IV; otls35X*

EB2361: *sax-7(eq1) otls76mgls18IV*

EB2362: *sax-7(nj53) otls76mgls18IV*

EB2363: *lad-2(tm3056) otls76mgls18IV*

EB2364: *otls76 mgls18 sax-7(dz156) lad-2(tm3056)IV*

EB614: *otls76 mgls18IV; sdn-1(zh20)X*

EB622: *unc-52(e998)II; otls76 mgls18IV*

OH3185: *otls76 mgls18IV; gpn-1(ok377)X*

EB613: *otls76 mgls18IV; lon-2(e678)X*

OH1945: *otls76 mgls18IV; hst-2(ok595)X*

EB1042: *otls76 mgls18IV; lon-2(e678) sdn-1(zh20)X*

EB1435: *otls76 mgls18sax-7(dz156)IV; sdn-1(zh20)X*

EB2356: *unc-52(E998)II; otIs76 mgIs18 sax-7(dz156)IV*  
EB2357: *otIs76 mgIs18 sax-7(dz156)IV; gpn-1(ok377)X*  
EB2358: *otIs76 mgIs18 sax-7(dz156)IV; lon-2(e678)X*  
EB2359: *otIs76 mgIs18 sax-7(dz156)IV; hst-2(ok595)X*  
EB2360: *otIs76 mgIs18 sax-7(dz156)IV; lon-2(e678) sdn-1(zh20)X*

**Strains related to branching in HSN neurons.**

EB2350: *sax-7(dz156)zdIs13IV*  
EB9: *zdIs13IV; kal-1(gb503)I*  
EB2351: *zdIs13IV; egl-15(n484)X*  
EB2496: *zdIs13IV; egl-17(n1377)X*  
EB2505: *zdIs13IV; hst-6(ok273)X*  
EB2352: *kal-1(gb503)I; sax-7(dz156)zdIs13IV*  
EB2353: *sax-7(dz156) zdIs13IV; egl-15(n484)X*  
EB2354: *kal-1(gb503)I; zdIs13IV; egl-15(n484)X*  
EB2355: *kal-1(gb503)I; sax-7(dz156) zdIs13IV; egl-15(n484)X*  
EB1762: *kal-1(gb503)I; zdIs13IV; hst-6(ok273)X*  
EB2500: *kal-1(gb503)I; zdIs13IV; egl-17(n1377)X*  
EB2501: *sax-7(dz156) zdIs13IV; egl-17(n1377)X*  
EB2502: *sax-7(dz156) zdIs13IV; hst-6(ok273)X*  
EB2503: *kal-1(gb503)I; sax-7(dz156) zdIs13IV; egl-17(n1377)X*

**Transgenic strains**

A complete list of all transgenic strains created for this study is shown in Table S3.

**Heterologous rescue of *kal-1/anosmin-1*-dependent branching and cell positioning defects of AIY**

The *sax-7S* or *sax-7L* (and variants) cDNAs were cloned under control of heterologous promoters (*Pdpy-7*: hypodermal (Gilleard et al., 1997), *Pmyo-3*: muscle (Okkema et al., 1993), *Punc-14*: pan-neuronal (Ogura et al., 1997), *Pttx-3*: AIY specific (Altun-Gultekin et al., 2001))(Table S1) and injected at 5 ng/μl, together with the *Pmyo-3::mCherry* marker at 50 ng/μl and *pBluescript* at 50 ng/μl injected into *sax-7(nj48) otIs76 mgIs18IV*.

### ***Heterologous rescue of HSN branching defects***

The *sax-7S*, *kal-1*, *egl-15A*, or *egl-17* (and variants) cDNAs were cloned under control of heterologous promoters to drive the expression in HSN (*Punc-86*) (Shen and Bargmann, 2003) or the vulval epithelium (*Pegl-17*) (Burdine et al., 1998)(Table S1) and were injected at 5 ng/μl, together with the *Pmyo-3::mCherry* or *Punc-122::mCherry* marker at 50 ng/μl and *pBluescript* at 50 ng/μl injected into the respective mutant strains.

## List of plasmids

| Plasmids for transgenesis                | Source                                                                                                                                                                                                 |
|------------------------------------------|--------------------------------------------------------------------------------------------------------------------------------------------------------------------------------------------------------|
| <i>Punc-14::sax-7S</i>                   | Gift of O. Hobert                                                                                                                                                                                      |
| <i>Punc-14::sax-7L</i>                   | Gift of O. Hobert                                                                                                                                                                                      |
| <i>Pdpy-7::sax-7S</i>                    | Gift of O. Hobert                                                                                                                                                                                      |
| <i>Pdpy-7::sax-7L</i>                    | Gift of O. Hobert                                                                                                                                                                                      |
| <i>Pmyo-3::sax-7S</i>                    | Gift of O. Hobert                                                                                                                                                                                      |
| <i>Pmyo-3::sax-7L</i>                    | Gift of O. Hobert                                                                                                                                                                                      |
| <i>Punc-86::mCherry</i>                  | Gift of K. Shen                                                                                                                                                                                        |
| <i>Pegl-17::syg-2</i>                    | Gift of K. Shen                                                                                                                                                                                        |
| <i>Pttx-3::sax-7S</i>                    | PCR the <i>sax-7S</i> cDNA with <i>KpnI/XbaI</i> cloning sites attached and cloned into <i>Pttx-3::hst-2</i> .<br>AAAGGTACCATGAGGAGCTTCATATTCCTC<br>and AAAAAATCTAGACTAGACAAACGTCGACGTTG               |
| <i>Pttx-3::sax-7L</i>                    | PCR the <i>sax-7L</i> cDNA with <i>KpnI/XbaI</i> cloning sites attached and cloned into <i>Pttx-3::hst-2</i> .                                                                                         |
| <i>Punc-14::sax-7S(ΔIgs)</i>             | site directed mutagenesis of <i>Pttx-3::sax-7S</i> and then cloning the <i>Punc-14</i> with <i>HindIII/BamHI</i> .<br>AACAGCCACAGGAACATCTGGAGGCATTTGTTGCA<br>and<br>TGCAACAAATGCCTCCAGATGTTCTGTGGCTGTT |
| <i>Punc-14::sax-7S(ΔFNIIIIs)</i>         | site directed mutagenesis of <i>Pttx-3::sax-7S</i> as described in Pocock <i>et al.</i> , (2008) and then cloning the <i>Punc-14</i> with <i>HindIII/BamHI</i> .                                       |
| <i>Punc-14::sax-7S(ΔIntra::mCherry)</i>  | made by PCR fusion as described in Pocock <i>et al.</i> , (2008) and then cloning the <i>Punc-14</i> with <i>HindIII/BamHI</i> .                                                                       |
| <i>Punc-86::sax-7S</i>                   | The <i>Punc-86</i> from <i>unc-86::mCherry</i> was cloned into <i>Pttx-3::sax-7S</i> with <i>XmaI/ApaI</i> .                                                                                           |
| <i>Punc-86::kal-1</i>                    | The <i>Punc-86</i> from <i>Punc-86::mCherry</i> was cloned into <i>Pttx-3::kal-1</i> with <i>XmaI/ApaI</i> .                                                                                           |
| <i>Punc-86::egl-15A</i>                  | The <i>Punc-86</i> from <i>Punc-86::mCherry</i> was cloned into <i>Pttx-3::egl-15A</i> with <i>XmaI/ApaI</i> .                                                                                         |
| <i>Punc-86::egl-17</i>                   | The <i>Punc-86</i> from <i>Punc-86::mCherry</i> was cloned into <i>Pttx-3::egl-17</i> with <i>XmaI/ApaI</i> .                                                                                          |
| <i>Punc-86::sax-7S(ΔIntra::mCherry)</i>  | The <i>Punc-86</i> from <i>Punc-86::mCherry</i> was cloned into <i>Punc-14::sax-7S(ΔIntra::mCherry)</i> with <i>XmaI/ApaI</i> .                                                                        |
| <i>Punc-86::egl-15A(ΔIntra::mCherry)</i> | The <i>Punc-86</i> from <i>Punc-86::mCherry</i> was cloned into <i>Punc-14::egl-17A(ΔIntra::mCherry)</i> with <i>XmaI/ApaI</i> .                                                                       |
| <i>Pegl-17::sax-7S</i>                   | The <i>Pegl-17</i> from <i>Pegl-17::syg-2</i> was cloned into <i>Pttx-3::sax-7S</i> with <i>XmaI/ApaI</i> .                                                                                            |
| <i>Pegl-17::kal-1</i>                    | The <i>Pegl-17</i> from <i>Pegl-17::syg-2</i> was cloned into <i>Pttx-3::kal-1</i> with <i>XmaI/ApaI</i> .                                                                                             |
| <i>Pegl-17::egl-15A</i>                  | The <i>Pegl-17</i> from <i>Pegl-17::syg-2</i> was cloned into <i>Pttx-3::egl-15A</i> with <i>XmaI/ApaI</i> .                                                                                           |
| <i>Pegl-17::egl-17</i>                   | The <i>Pegl-17</i> from <i>Pegl-17::syg-2</i> was cloned into <i>Pttx-3::egl-17</i> with <i>XmaI/ApaI</i> .                                                                                            |



| Plasmids for cell culture                             | Source                                                                                                                                                                                                                                                                                                                                                                                                                                                                                                |
|-------------------------------------------------------|-------------------------------------------------------------------------------------------------------------------------------------------------------------------------------------------------------------------------------------------------------------------------------------------------------------------------------------------------------------------------------------------------------------------------------------------------------------------------------------------------------|
| <i>pcDNA3.1::sax-7S::V5</i>                           | PCR amplification of the <i>sax-7S-V5</i> cDNA fragment from RP17 (Pocock et al., 2008) with <i>KpnI/SacI</i> cloning sites attached and cloned it into <i>pPD49.26</i> . Then a <i>BglII/Spel</i> piece was cloned into <i>Pttx-3::sax-7S</i> , creating <i>Pttx-3::sax-7S::V5</i> plasmid. Then a <i>KpnI/Agel</i> piece from <i>Pttx-3::sax-7S::V5</i> was cloned into <i>pcDNA-V5-HisA</i> , creating the <i>pcDNA3.1::sax-7S::V5</i> .                                                           |
| <i>pcDNA3.1::sax-7S(<math>\Delta</math>Igs)::V5</i>   | Made by cloning the <i>KpnI/Agel</i> piece from <i>Pttx-3::sax-7S<math>\Delta</math>Ig::V5</i> into <i>pcDNA3.1::sax-7S::V5</i> . <i>Pttx-3::sax-7S<math>\Delta</math>Ig::V5</i> was constructed by cloning the <i>KpnI/BglII</i> piece of <i>Pttx-3::sax-7S<math>\Delta</math>Ig</i> into <i>Pttx-3::sax-7S::V5</i> .                                                                                                                                                                                |
| <i>pcDNA3.1::sax-7S(<math>\Delta</math>FNIII)::V5</i> | made by cloning the <i>KpnI/Sall</i> piece of <i>Pttx-3::sax-7S<math>\Delta</math>FNIII</i> into <i>pcDNA3.1::sax-7S::V5</i> .                                                                                                                                                                                                                                                                                                                                                                        |
| <i>pcDNA3.1::sax-7S(<math>\Delta</math>Intra)::V5</i> | Made by cloning the <i>KpnI/Agel</i> piece from <i>Pttx-3::sax-7S<math>\Delta</math>intra::V5</i> into <i>pcDNA3.1::sax-7S::V5</i> . <i>Pttx-3::sax-7S<math>\Delta</math>intra::V5</i> was made by site directed mutagenesis of <i>Pttx-3::sax-7S::V5</i> using the following primers: cagaattgtctgacccttcagacaacacagcagatg and catctgctgtgttctgcaagggtcaagacaattctg.                                                                                                                                 |
| <i>pCMV8::3xFLAG::egl-15A</i>                         | PCR amplification of the <i>egl-15(A)</i> cDNA without the start ATG with <i>NotI/XbaI</i> cloning sites attached and cloned into <i>pCMV8::3xFLAG::eva-1</i> (gift from J. Culotti) using the following primers: aaaaaagcggccgagttattccttgcatctgct and aaaaaatctagatcaaaattcgggttgctcatgc. The endogenous signal peptide of <i>egl-15A</i> was deleted from the construct by site-directed mutagenesis using the following plasmids: ggtcaatcctgaagcgcggccgcaagctt and aagcttgcggccgcttcaaggattgacc. |
| <i>pcDNA3.1::3xHA::kal-1</i>                          | Made by cloning the <i>KpnI/XbaI</i> piece from <i>Pttx-3::3xHA::KAL-1</i> (Bülow et al. 2002) into <i>pcDNA3.1(+)</i> .                                                                                                                                                                                                                                                                                                                                                                              |
| <i>pCMV8::3xFLAG::hFGFR1</i>                          | PCR amplification of the FGFR1 cDNA without the start ATG and signal sequence with <i>HindIII/XbaI</i> cloning sites attached and cloned into <i>pCMV8::3xFLAG::eva-1</i> (gift from J. Culotti) using the following primers: aaaaaaagcttccgtccccgacctgctgaacaagccc and aaaaaatctagatcagcggcgttgagtcgccattggc.                                                                                                                                                                                        |
| <i>pcDNA3.1::hKAL1::3xHA</i>                          | PCR amplification of the KAL1 cDNA fragment from NIH_MGC_311 without the STOP codon and with <i>BamHI/XbaI</i> cloning sites attached and cloned it into <i>pcDNA-3xHA-His</i> , creating the <i>pcDNA3.1::hKAL1::3xHA</i> . The following primers were used: aaaaaaggatccatggtgcccggtgccccggcgcg and aaaaaatctagattgtatcttctggagaaggctg.                                                                                                                                                             |
| <i>pcDNA3.1::hL1CAM::V5</i>                           | PCR amplification of the L1CAM cDNA fragment from NIH_MGC_364 without the STOP codon and with <i>HindIII/XbaI</i> cloning sites attached and cloned it into <i>pcDNA-V5-HisA</i> , creating the <i>pcDNA3.1::hL1CAM::V5</i> . The following primers were used: aaaaaaagcttatggtcgctggcgctgcggtactgtggcc and aaaaaatctagattctagggccacggcagggttgatggggg .                                                                                                                                               |

List of transgenic strains

| Strain name | Constructs                                                  | Genotype                                    | Line <sup>a</sup> |
|-------------|-------------------------------------------------------------|---------------------------------------------|-------------------|
| EB1686      | <i>Punc-14::sax-7S</i> and <i>Pmyo-3::mCherry</i>           | <i>dzEx813; sax-7(nj48) otIs76mgIs18IV</i>  | 1                 |
| EB1687      | <i>Punc-14::sax-7S</i> and <i>Pmyo-3::mCherry</i>           | <i>dzEx814; sax-7(nj48) otIs76mgIs18IV</i>  | 2                 |
| EB1463      | <i>Punc-14::sax-7L</i> and <i>Pmyo-3::mCherry</i>           | <i>dzEx663; sax-7(nj48) otIs76mgIs18IV</i>  | 1                 |
| EB1552      | <i>Punc-14::sax-7L</i> and <i>Pmyo-3::mCherry</i>           | <i>dzEx732; sax-7(nj48) otIs76mgIs18IV</i>  | 2                 |
| EB1553      | <i>Punc-14::sax-7L</i> and <i>Pmyo-3::mCherry</i>           | <i>dzEx733; sax-7(nj48) otIs76mgIs18IV</i>  | 3                 |
| EB1464      | <i>Pdpy-7::sax-7S</i> and <i>Pmyo-3::mCherry</i>            | <i>dzEx664; sax-7(nj48) otIs76mgIs18IV</i>  | 1                 |
| EB1465      | <i>Pdpy-7::sax-7S</i> and <i>Pmyo-3::mCherry</i>            | <i>dzEx665; sax-7(nj48) otIs76mgIs18IV</i>  | 2                 |
| EB1554      | <i>Pdpy-7::sax-7S</i> and <i>Pmyo-3::mCherry</i>            | <i>dzEx734; sax-7(nj48) otIs76mgIs18IV</i>  | 5                 |
| EB1556      | <i>Pdpy-7::sax-7S</i> and <i>Pmyo-3::mCherry</i>            | <i>dzEx736; sax-7(nj48) otIs76mgIs18IV</i>  | 4                 |
| EB1563      | <i>Pdpy-7::sax-7S</i> and <i>Pmyo-3::mCherry</i>            | <i>dzEx741; sax-7(nj48) otIs76mgIs18IV</i>  | 3                 |
| EB1690      | <i>Pdpy-7::sax-7L</i> and <i>Pmyo-3::mCherry</i>            | <i>dzEx817; sax-7(nj48) otIs76mgIs18IV</i>  | 1                 |
| EB2334      | <i>Pdpy-7::sax-7L</i> and <i>Pmyo-3::mCherry</i>            | <i>dzEx1305; sax-7(nj48) otIs76mgIs18IV</i> | 2                 |
| EB1462      | <i>Pmyo-3::sax-7S</i> and <i>Pmyo-3::mCherry</i>            | <i>dzEx662; sax-7(nj48) otIs76mgIs18IV</i>  | 1                 |
| EB1656      | <i>Pmyo-3::sax-7S</i> and <i>Pmyo-3::mCherry</i>            | <i>dzEx799; sax-7(nj48) otIs76mgIs18IV</i>  | 2                 |
| EB1657      | <i>Pmyo-3::sax-7S</i> and <i>Pmyo-3::mCherry</i>            | <i>dzEx800; sax-7(nj48) otIs76mgIs18IV</i>  | 3                 |
| EB1658      | <i>Pmyo-3::sax-7S</i> and <i>Pmyo-3::mCherry</i>            | <i>dzEx801; sax-7(nj48) otIs76mgIs18IV</i>  | 4                 |
| EB1659      | <i>Pmyo-3::sax-7S</i> and <i>Pmyo-3::mCherry</i>            | <i>dzEx802; sax-7(nj48) otIs76mgIs18IV</i>  | 5                 |
| EB1466      | <i>Pmyo-3::sax-7L</i> and <i>Pmyo-3::mCherry</i>            | <i>dzEx666; sax-7(nj48) otIs76mgIs18IV</i>  | 2                 |
| EB1688      | <i>Pmyo-3::sax-7L</i> and <i>Pmyo-3::mCherry</i>            | <i>dzEx815; sax-7(nj48) otIs76mgIs18IV</i>  | 1                 |
| EB1689      | <i>Pmyo-3::sax-7L</i> and <i>Pmyo-3::mCherry</i>            | <i>dzEx816; sax-7(nj48) otIs76mgIs18IV</i>  | 3                 |
| EB1635      | <i>Pttx-3::sax-7S</i> and <i>Pmyo-3::mCherry</i>            | <i>dzEx789; sax-7(nj48) otIs76mgIs18IV</i>  | 1                 |
| EB1636      | <i>Pttx-3::sax-7S</i> and <i>Pmyo-3::mCherry</i>            | <i>dzEx790; sax-7(nj48) otIs76mgIs18IV</i>  | 2                 |
| EB1637      | <i>Pttx-3::sax-7S</i> and <i>Pmyo-3::mCherry</i>            | <i>dzEx791; sax-7(nj48) otIs76mgIs18IV</i>  | 3                 |
| EB1638      | <i>Pttx-3::sax-7S</i> and <i>Pmyo-3::mCherry</i>            | <i>dzEx792; sax-7(nj48) otIs76mgIs18IV</i>  | 4                 |
| EB1639      | <i>Pttx-3::sax-7S</i> and <i>Pmyo-3::mCherry</i>            | <i>dzEx793; sax-7(nj48) otIs76mgIs18IV</i>  | 5                 |
| EB1640      | <i>Pttx-3::sax-7S</i> and <i>Pmyo-3::mCherry</i>            | <i>dzEx794; sax-7(nj48) otIs76mgIs18IV</i>  | 6                 |
| EB1660      | <i>Pttx-3::sax-7S</i> and <i>Pmyo-3::mCherry</i>            | <i>dzEx803; sax-7(nj48) otIs76mgIs18IV</i>  | 9                 |
| EB1661      | <i>Pttx-3::sax-7S</i> and <i>Pmyo-3::mCherry</i>            | <i>dzEx804; sax-7(nj48) otIs76mgIs18IV</i>  | 10                |
| EB1662      | <i>Pttx-3::sax-7S</i> and <i>Pmyo-3::mCherry</i>            | <i>dzEx805; sax-7(nj48) otIs76mgIs18IV</i>  | 11                |
| EB1668      | <i>Pttx-3::sax-7S</i> and <i>Pmyo-3::mCherry</i>            | <i>dzEx807; sax-7(nj48) otIs76mgIs18IV</i>  | 12                |
| EB1669      | <i>Pttx-3::sax-7S</i> and <i>Pmyo-3::mCherry</i>            | <i>dzEx808; sax-7(nj48) otIs76mgIs18IV</i>  | 13                |
| EB1681      | <i>Pttx-3::sax-7S</i> and <i>Pmyo-3::mCherry</i>            | <i>dzEx812; sax-7(nj48) otIs76mgIs18IV</i>  | 8                 |
| EB1703      | <i>Pttx-3::sax-7S</i> and <i>Pmyo-3::mCherry</i>            | <i>dzEx830; sax-7(nj48) otIs76mgIs18IV</i>  | 7                 |
| EB1641      | <i>Pttx-3::sax-7L</i> and <i>Pmyo-3::mCherry</i>            | <i>dzEx795; sax-7(nj48) otIs76mgIs18IV</i>  | 1                 |
| EB1642      | <i>Pttx-3::sax-7L</i> and <i>Pmyo-3::mCherry</i>            | <i>dzEx796; sax-7(nj48) otIs76mgIs18IV</i>  | 2                 |
| EB2335      | <i>Punc-14::sax-7S(ΔIgs)</i> and <i>Pmyo-3::mCherry</i>     | <i>dzEx1306; sax-7(nj48) otIs76mgIs18IV</i> | 1                 |
| EB2336      | <i>Punc-14::sax-7S(ΔIgs)</i> and <i>Pmyo-3::mCherry</i>     | <i>dzEx1307; sax-7(nj48) otIs76mgIs18IV</i> | 2                 |
| EB2337      | <i>Punc-14::sax-7S(ΔIgs)</i> and <i>Pmyo-3::mCherry</i>     | <i>dzEx1308; sax-7(nj48) otIs76mgIs18IV</i> | 3                 |
| EB2338      | <i>Punc-14::sax-7S(ΔIgs)</i> and <i>Pmyo-3::mCherry</i>     | <i>dzEx1309; sax-7(nj48) otIs76mgIs18IV</i> | 4                 |
| EB2339      | <i>Punc-14::sax-7S(ΔFNIIIIs)</i> and <i>Pmyo-3::mCherry</i> | <i>dzEx1310; sax-7(nj48) otIs76mgIs18IV</i> | 1                 |

|        |                                                                       |                                             |   |
|--------|-----------------------------------------------------------------------|---------------------------------------------|---|
| EB2340 | <i>Punc-14::sax-7S(ΔFNIIIIs)</i> and <i>Pmyo-3::mCherry</i>           | <i>dzEx1311; sax-7(nj48) otls76mgls18IV</i> | 2 |
| EB2341 | <i>Punc-14::sax-7S(ΔFNIIIIs)</i> and <i>Pmyo-3::mCherry</i>           | <i>dzEx1312; sax-7(nj48) otls76mgls18IV</i> | 3 |
| EB2342 | <i>Punc-14::sax-7S(ΔFNIIIIs)</i> and <i>Pmyo-3::mCherry</i>           | <i>dzEx1313; sax-7(nj48) otls76mgls18IV</i> | 4 |
| EB2343 | <i>Punc-14::sax-7S(ΔFNIIIIs)</i> and <i>Pmyo-3::mCherry</i>           | <i>dzEx1314; sax-7(nj48) otls76mgls18IV</i> | 5 |
| EB2344 | <i>Punc-14::sax-7S(ΔFNIIIIs)</i> and <i>Pmyo-3::mCherry</i>           | <i>dzEx1315; sax-7(nj48) otls76mgls18IV</i> | 6 |
| EB2345 | <i>Punc-14::sax-7S(ΔFNIIIIs)</i> and <i>Pmyo-3::mCherry</i>           | <i>dzEx1316; sax-7(nj48) otls76mgls18IV</i> | 7 |
| EB2346 | <i>Punc-14::sax-7S(ΔFNIIIIs)</i> and <i>Pmyo-3::mCherry</i>           | <i>dzEx1317; sax-7(nj48) otls76mgls18IV</i> | 8 |
| EB2347 | <i>Punc-14::sax-7S(ΔIntra::mCherry)</i> and <i>Pmyo-3::mCherry</i>    | <i>dzEx1318; sax-7(nj48) otls76mgls18IV</i> | 1 |
| EB2348 | <i>Punc-14::sax-7S(ΔIntra::mCherry)</i> and <i>Pmyo-3::mCherry</i>    | <i>dzEx1319; sax-7(nj48) otls76mgls18IV</i> | 2 |
| EB2349 | <i>Punc-14::sax-7S(ΔIntra::mCherry)</i> and <i>Pmyo-3::mCherry</i>    | <i>dzEx1320; sax-7(nj48) otls76mgls18IV</i> | 3 |
| EB2478 | <i>Punc-86::sax-7S</i> and <i>Pmyo-3::mCherry</i>                     | <i>dzEX1398; sax-7(nj48) zdls13IV</i>       | 1 |
| EB2479 | <i>Punc-86::sax-7S(ΔIntra::mCherry)</i> and <i>Punc-122::mCherry</i>  | <i>dzEX1399; sax-7(nj48) zdls13IV</i>       | 1 |
| EB2480 | <i>Punc-86::sax-7S(ΔIntra::mCherry)</i> and <i>Punc-122::mCherry</i>  | <i>dzEX1400; sax-7(nj48) zdls13IV</i>       | 2 |
| EB2481 | <i>Punc-86::sax-7S(ΔIntra::mCherry)</i> and <i>Punc-122::mCherry</i>  | <i>dzEX1401; sax-7(nj48) zdls13IV</i>       | 3 |
| EB2482 | <i>Punc-86::sax-7S(ΔIntra::mCherry)</i> and <i>Punc-122::mCherry</i>  | <i>dzEX1402; sax-7(nj48) zdls13IV</i>       | 4 |
| EB2483 | <i>Pegl-17::sax-7S</i> and <i>Pmyo-3::mCherry</i>                     | <i>dzEX1403; sax-7(nj48) zdls13IV</i>       | 1 |
| EB2484 | <i>Pegl-17::sax-7S</i> and <i>Pmyo-3::mCherry</i>                     | <i>dzEX1404; sax-7(nj48) zdls13IV</i>       | 2 |
| EB2485 | <i>Punc-86::egl-15A</i> and <i>Pmyo-3::mCherry</i>                    | <i>dzEX1405; zdls13IV; egl-15(n484)X</i>    | 1 |
| EB2486 | <i>Punc-86::egl-15A</i> and <i>Pmyo-3::mCherry</i>                    | <i>dzEX1406; zdls13IV; egl-15(n484)X</i>    | 2 |
| EB2487 | <i>Punc-86::egl-15A(ΔIntra::mCherry)</i> and <i>Punc-122::mCherry</i> | <i>dzEX1407; zdls13IV; egl-15(n484)X</i>    | 1 |
| EB2521 | <i>Punc-86::egl-15A(ΔIntra::mCherry)</i> and <i>Punc-122::mCherry</i> | <i>dzEX1420; zdls13IV; egl-15(n484)X</i>    | 2 |
| EB2522 | <i>Punc-122::mCherry</i>                                              | <i>dzEX1421; zdls13IV; egl-15(n484)X</i>    | 3 |
| EB2523 | <i>Punc-86::egl-15A(ΔIntra::mCherry)</i> and <i>Punc-122::mCherry</i> | <i>dzEX1422; zdls13IV; egl-15(n484)X</i>    | 4 |
| EB2524 | <i>Punc-122::mCherry</i>                                              | <i>dzEX1423; zdls13IV; egl-15(n484)X</i>    | 5 |
| EB2525 | <i>Punc-86::egl-15A(ΔIntra::mCherry)</i> and <i>Punc-122::mCherry</i> | <i>dzEX1424; zdls13IV; egl-15(n484)X</i>    | 6 |
| EB2526 | <i>Punc-122::mCherry</i>                                              | <i>dzEX1425; zdls13IV; egl-15(n484)X</i>    | 7 |
| EB2527 | <i>Punc-86::egl-15A(ΔIntra::mCherry)</i> and <i>Punc-122::mCherry</i> | <i>dzEX1426; zdls13IV; egl-15(n484)X</i>    | 8 |
| EB2488 | <i>Pegl-17::egl-15A</i> and <i>Pmyo-3::mCherry</i>                    | <i>dzEX1408; zdls13IV; egl-15(n484)X</i>    | 1 |
| EB2489 | <i>Pegl-17::egl-15A</i> and <i>Pmyo-3::mCherry</i>                    | <i>dzEX1409; zdls13IV; egl-15(n484)X</i>    | 2 |

|        |                                                       |                                           |   |
|--------|-------------------------------------------------------|-------------------------------------------|---|
|        | <i>Pmyo-3::mCherry</i>                                |                                           |   |
| EB2490 | <i>Pegl-17::egl-15A</i> and<br><i>Pmyo-3::mCherry</i> | <i>dzEX1410; zdls13IV; egl-15(n484)X</i>  | 3 |
| EB2491 | <i>Punc-86::kal-1</i> and<br><i>Pmyo-3::mCherry</i>   | <i>dzEX1411; kal-1(gb503)I; zdls13IV</i>  | 1 |
| EB2492 | <i>Punc-86::kal-1</i> and<br><i>Pmyo-3::mCherry</i>   | <i>dzEX1412; kal-1(gb503)I; zdls13IV</i>  | 2 |
| EB2493 | <i>Punc-86::kal-1</i> and<br><i>Pmyo-3::mCherry</i>   | <i>dzEX1413; kal-1(gb503)I; zdls13IV</i>  | 3 |
| EB2494 | <i>Pegl-17::kal-1</i> and<br><i>Pmyo-3::mCherry</i>   | <i>dzEX1414; kal-1(gb503)I; zdls13IV</i>  | 1 |
| EB2495 | <i>Pegl-17::kal-1</i> and<br><i>Pmyo-3::mCherry</i>   | <i>dzEX1415; kal-1(gb503)I; zdls13IV</i>  | 2 |
| EB2497 | <i>Punc-86::egl-17</i> and<br><i>Pmyo-3::mCherry</i>  | <i>dzEX1416; zdls13IV; egl-17(n1377)X</i> | 1 |
| EB2498 | <i>Punc-86::egl-17</i> and<br><i>Pmyo-3::mCherry</i>  | <i>dzEX1417; zdls13IV; egl-17(n1377)X</i> | 2 |
| EB2499 | <i>Pegl-17::egl-17</i> and<br><i>Pmyo-3::mCherry</i>  | <i>dzEX1418; zdls13IV; egl-17(n1377)X</i> | 1 |

<sup>a</sup> line refers to the respective numbering of extrachromosomal transgenic lines used in supplemental Dataset 2.

### **Supplemental References**

Clark, S.G., and Chiu, C. (2003). *C. elegans* ZAG-1, a Zn-finger-homeodomain protein, regulates axonal development and neuronal differentiation. *Development* *130*, 3781-3794.
